# Supplementary material for: A self-powered flexible UV-visible photodetector with high photosensitivity based on BiFeO3/XTiO3 (Sr, Zn, Pb) multilayer films
Source: Royal Society of Chemistry journal article supplement (doi:10.1039/d1ta10819k), 2022-01-01
Supplement: d1ta10819k1.pdf [file d1ta10819k1.pdf]

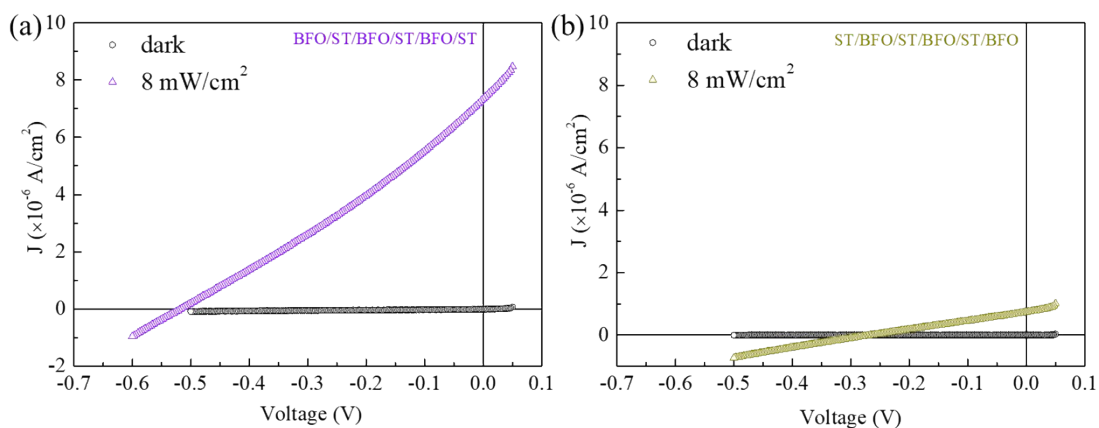

S1 (a-b) the J-V curves under the illumination of 365 nm with 8 mW/cm<sup>2</sup> for BFO/ST/BFO/ST/BFO/ST and ST/BFO/ST/BFO/ST/BFO multilayer films.

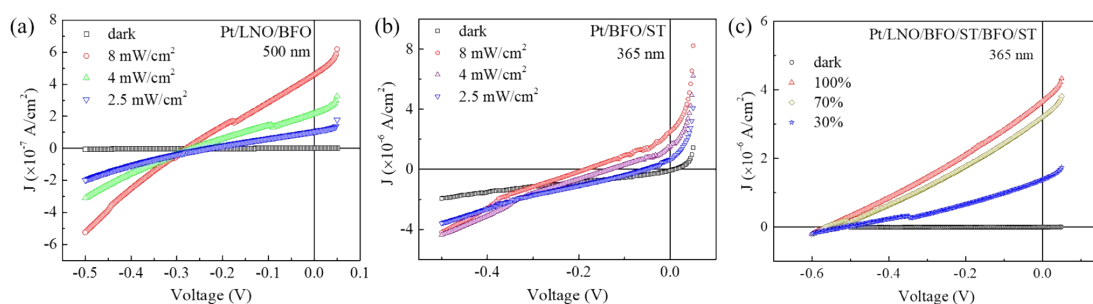

S2 (a-c) the J-V curves under the illumination of 365 and 500 nm with different power densities for Pt/LNO/BFO, Pt/BFO/ST, and Pt/LNO/BFO/ST/BFO/ST multilayer films.
